# Supplementary material for: Revealing the improved stability of amorphous boron-nitride upon carbon doping
Source: Royal Society of Chemistry journal article supplement (doi:10.1039/d2nh00520d), 2022-12-20

Energy on training data

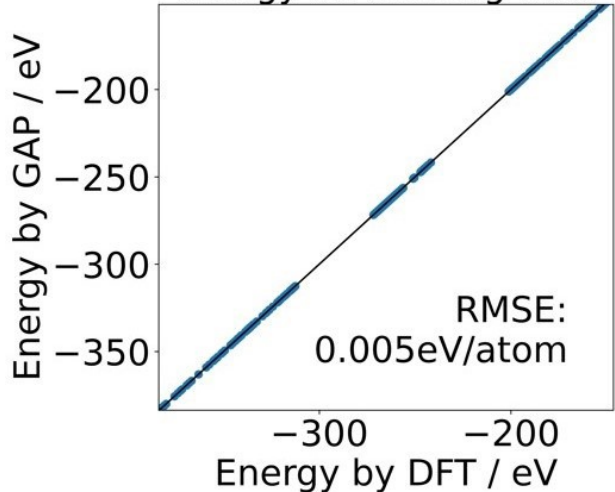

Energy on validation data

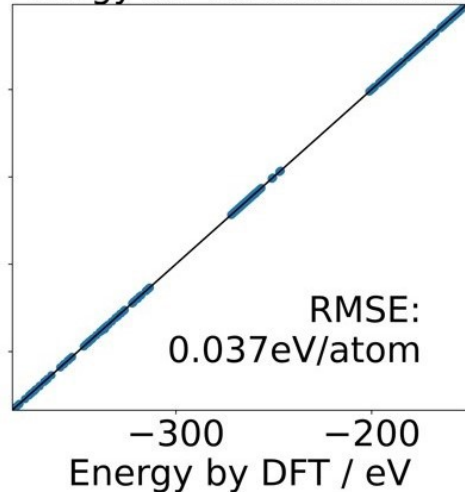

Force on training data

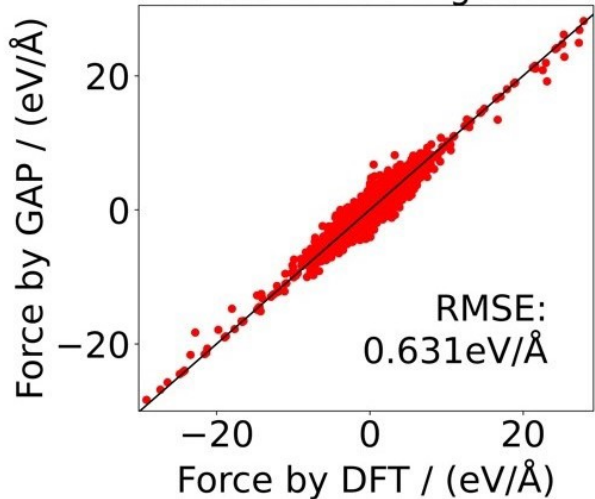

Force on validation data

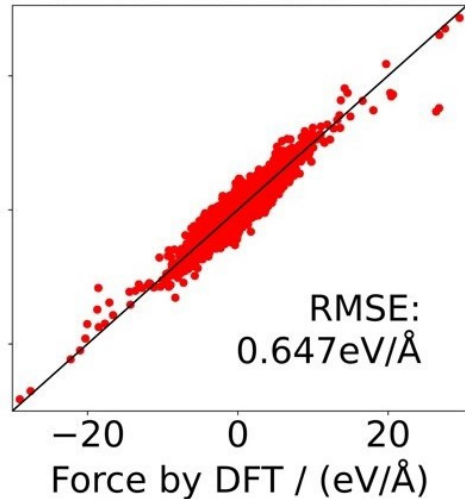

Supplement: d2nh00520d2.pdf [file d2nh00520d2.pdf]
