# Supplementary figures and images for: Revealing the improved stability of amorphous boron-nitride upon carbon doping
Source: Royal Society of Chemistry journal article supplement (doi:10.1039/d2nh00520d), 2022-12-20

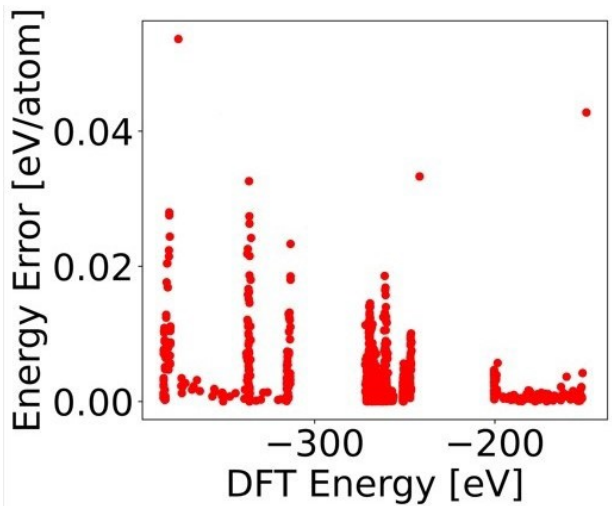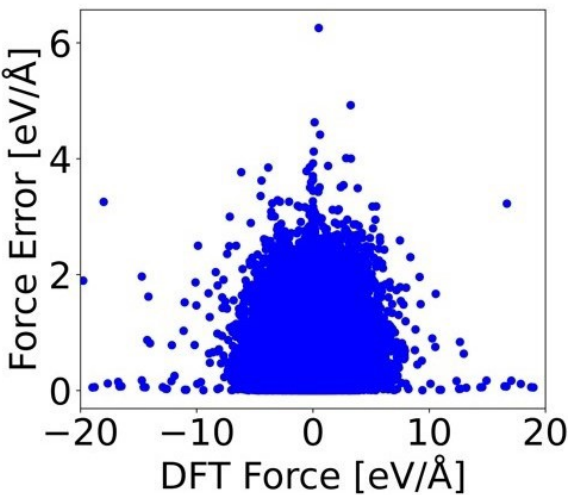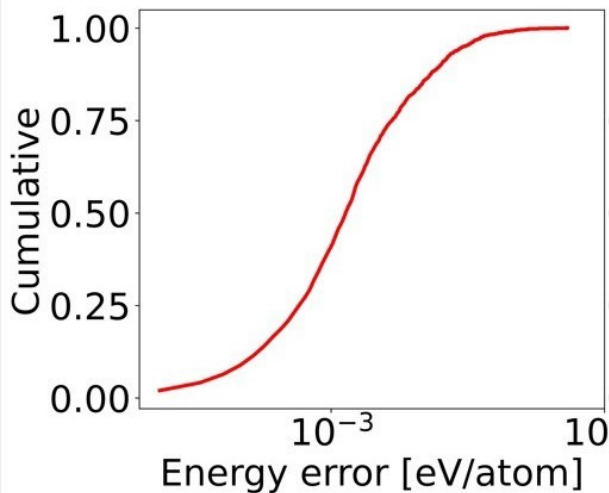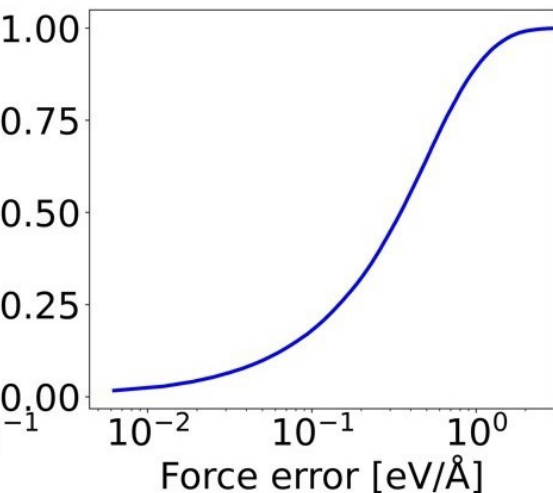

Supplement: d2nh00520d3.pdf [file d2nh00520d3.pdf]

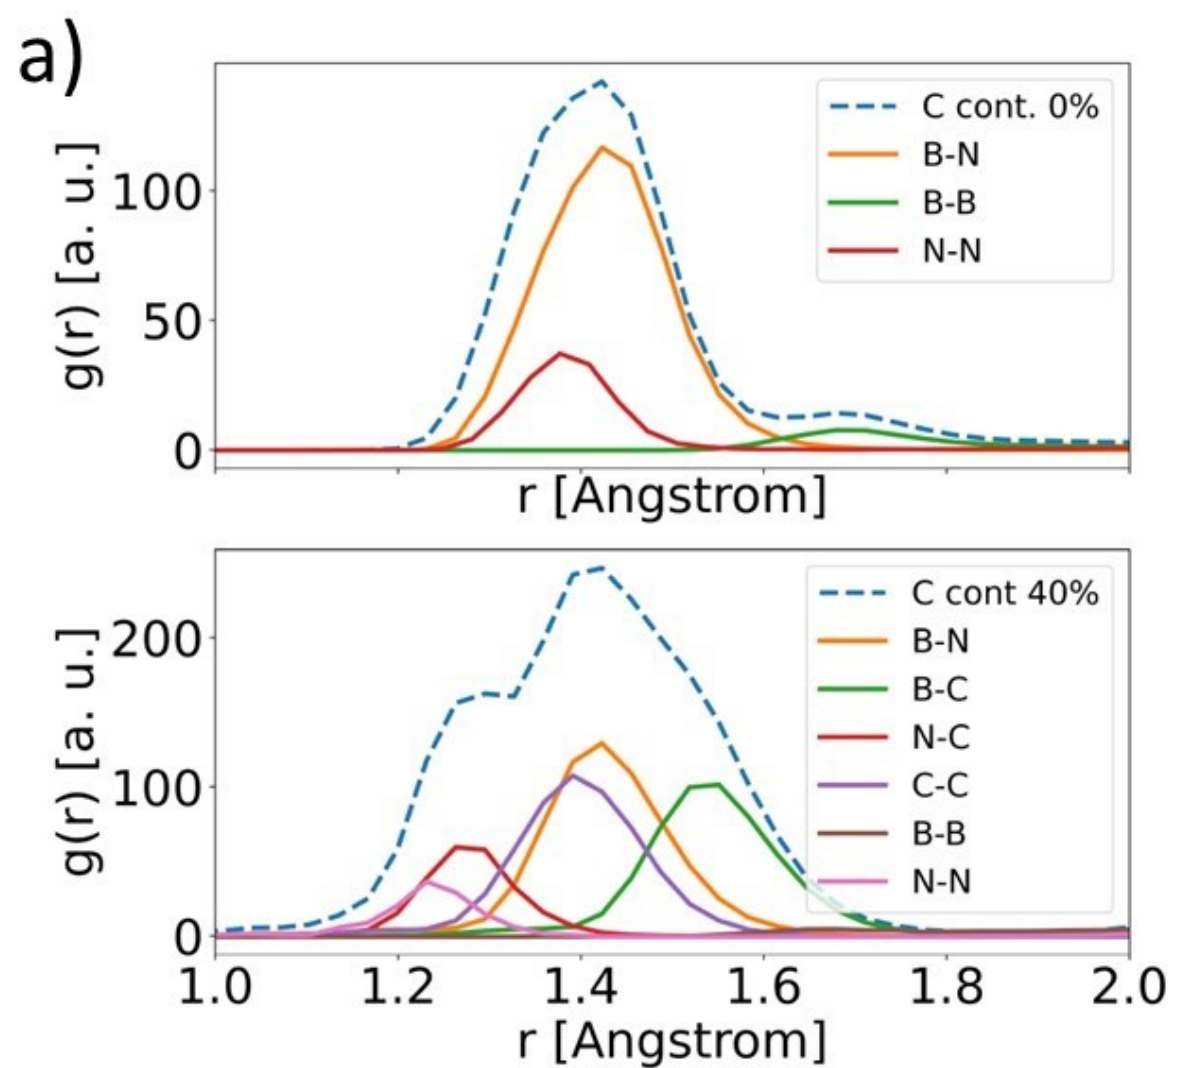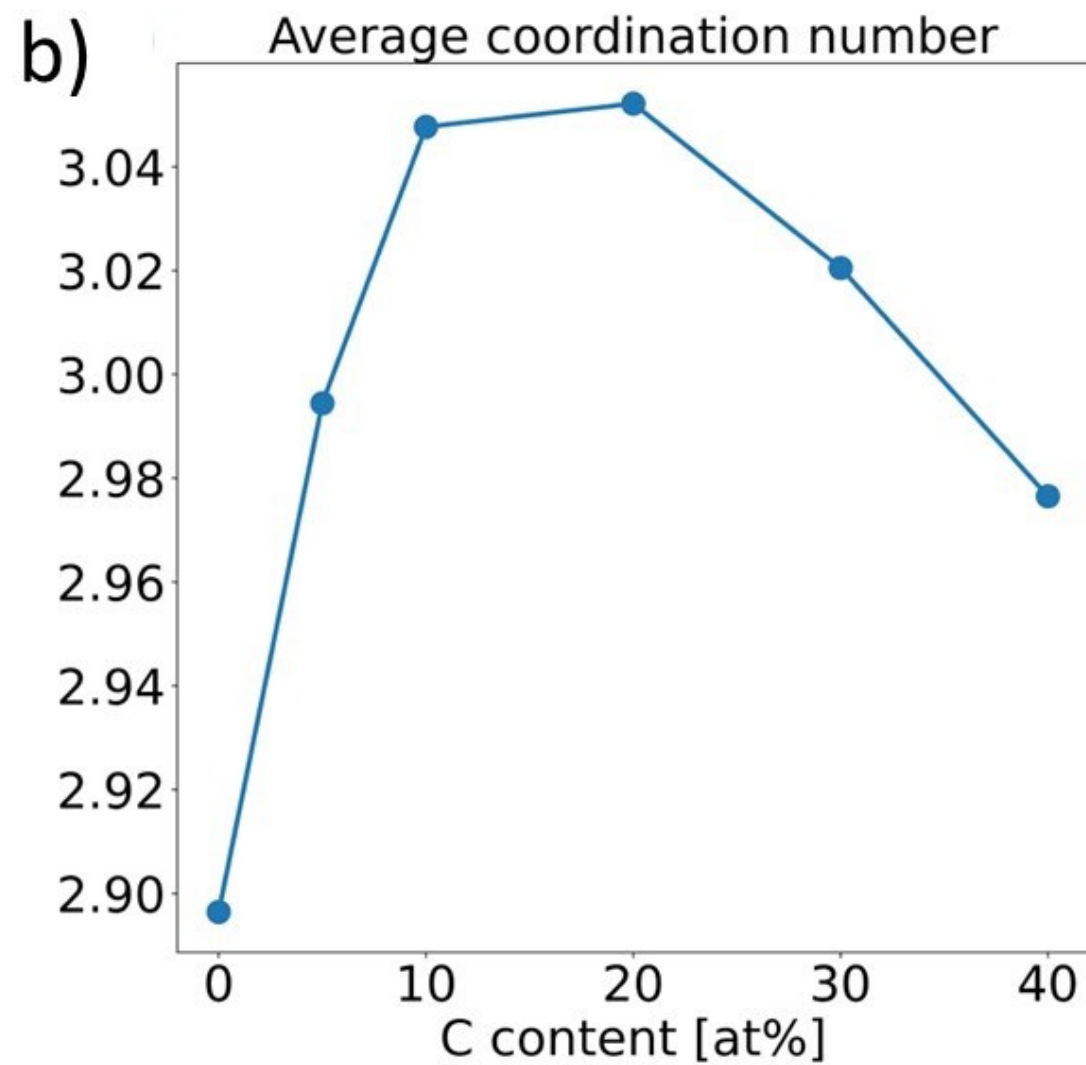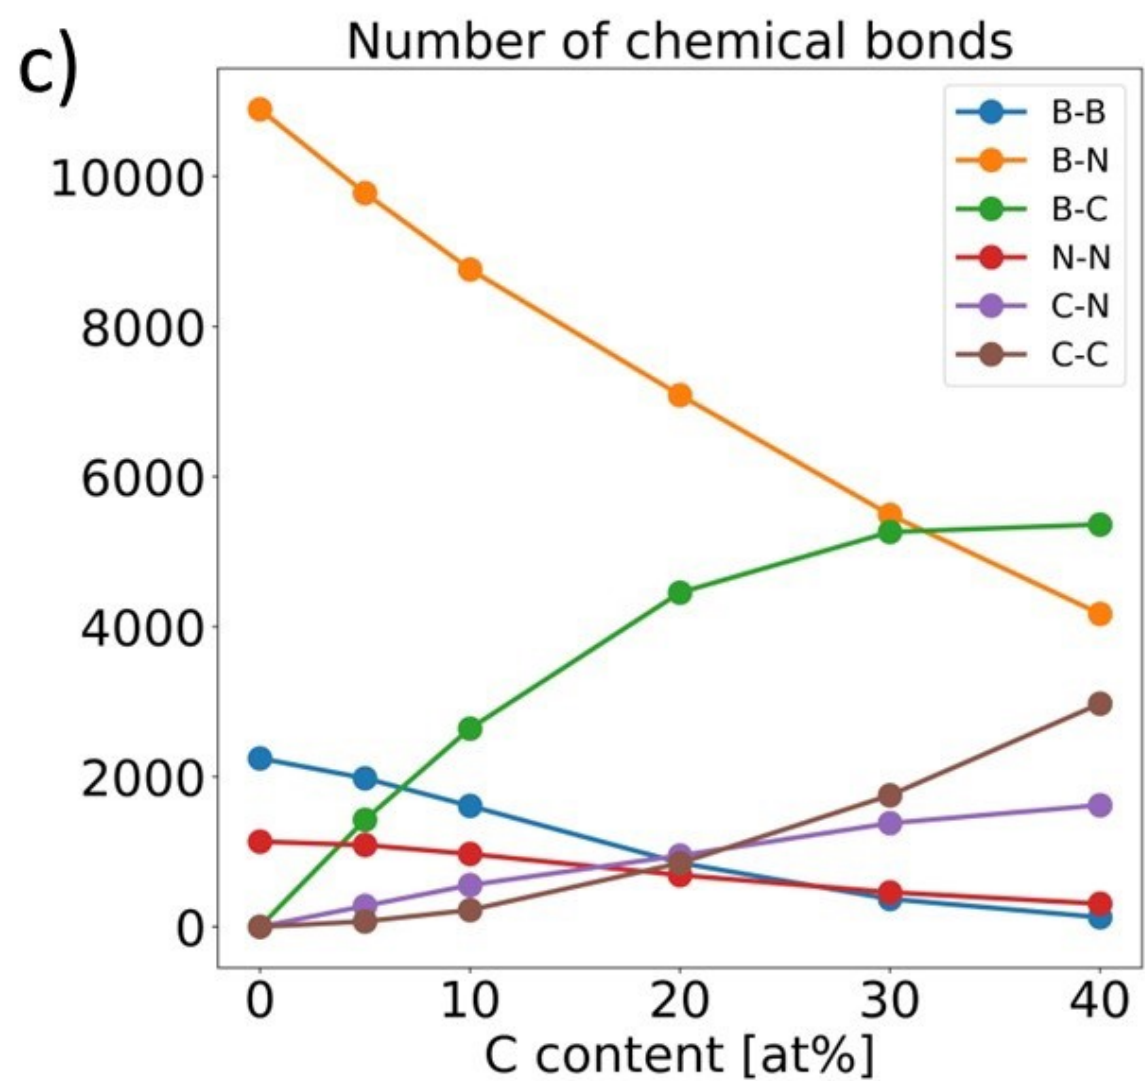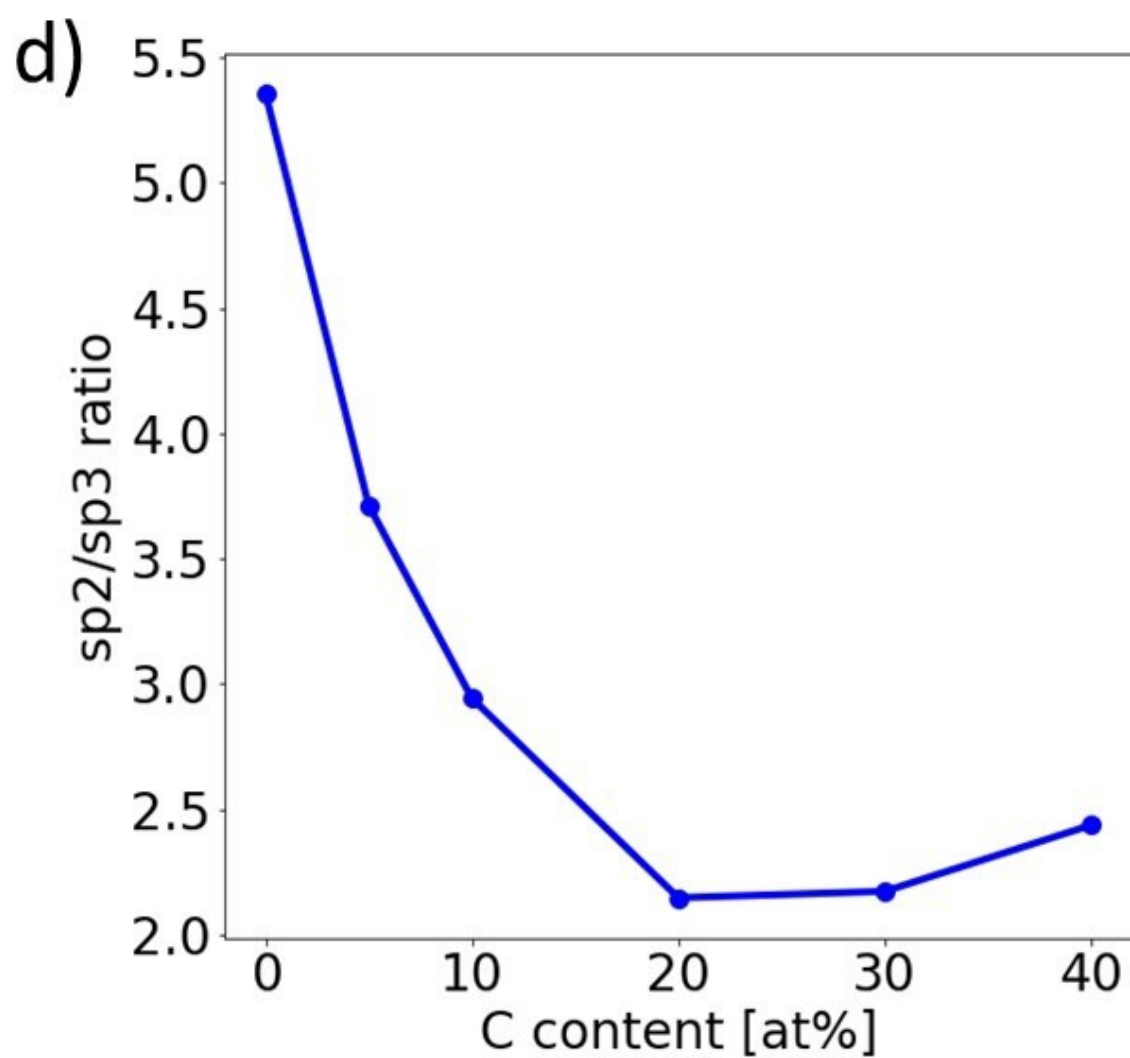

Supplement: d2nh00520d4.pdf [file d2nh00520d4.pdf]

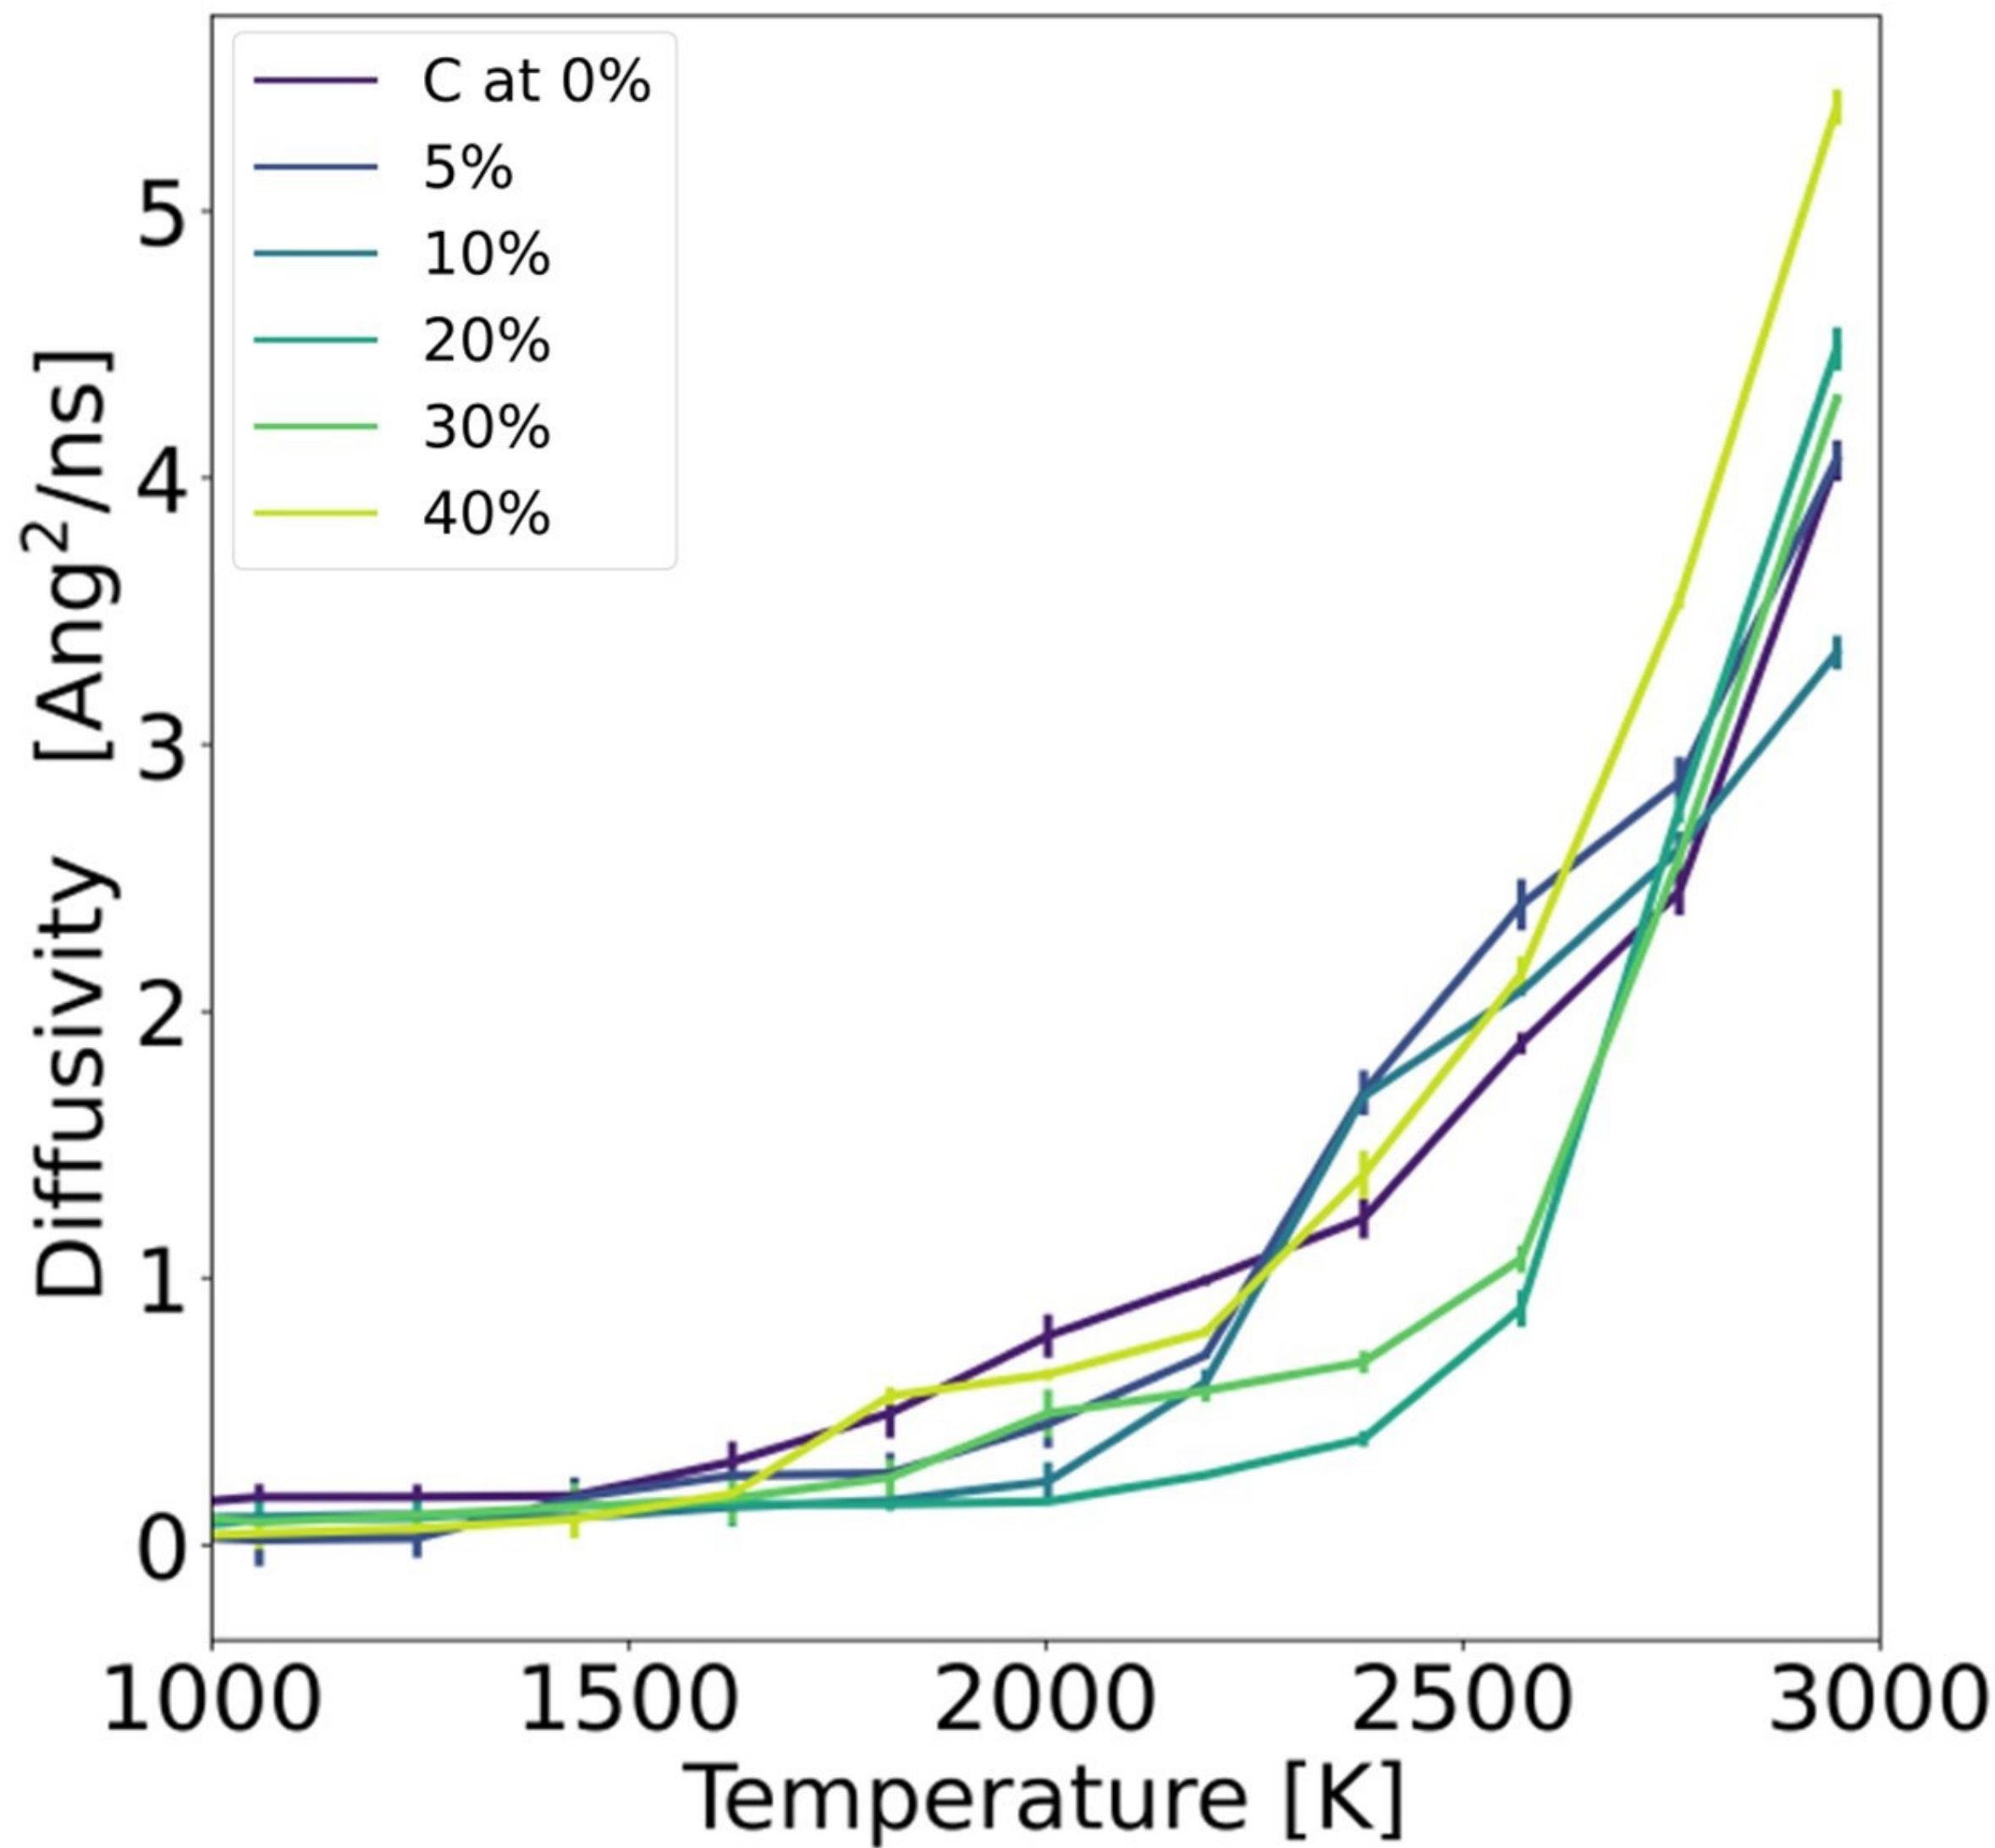

Supplement: d2nh00520d5.pdf [file d2nh00520d5.pdf]
